# Supplementary material for: White matter retention on 18F-florbetapir positron emission tomography independently predicts cognitive decline and response to anti-amyloid therapy in Alzheimer’s disease
Source: Research Square preprint supplement (doi:10.21203/rs.3.rs-7158871/v1), 2025-08-05
Supplement: Supplementary file 1 [file b30cbf5675cc891f51354d27.pdf]

## Supplementary information

### White matter retention on $^{18}\text{F}$ -florbetapir positron emission tomography independently predicts cognitive decline and response to anti-amyloid therapy in Alzheimer's disease

Huamei Lin, Ying Zhang, Ruiqing Ni, Min Wang, Jianwei Men, Jingjie Ge, Jiaying Lu, Jing Wang, Huiwei Zhang, Yunhao Yang, Zhengwei Zhang, Yuhua Zhu, Hongguang Zhao, Tzu-Chen Yen, Junlong Wang, Yihui Guan, Min Fang, Jintai Yu, Jiehui Jiang, Chuantao Zuo, The Alzheimer's Disease Neuroimaging Initiative

#### \*Corresponding authors:

Min Fang, fangmin\_dr@126.com.

Jintai Yu, jintai\_yu@fudan.edu.cn.

Jiehui Jiang, jiangjiehui@shu.edu.cn.

Chuantao Zuo, zuochuantao@fudan.edu.cn.

#### Supplementary Table 1 | Participant demographics and clinical characteristics for post mortem brain tissue analysis

|                                | CN (N=4)   | AD (N=9)  | <i>p</i> value |
|--------------------------------|------------|-----------|----------------|
| Age,years                      | 74.2(16.1) | 80.1(9.8) | 0.4769         |
| Women,n,%                      | 2,50%      | 9,100%    | 0.0769         |
| APOE $\epsilon$ 4 carriers,n,% | 1,25%      | 5,56%     | 0.5594         |

Continuous variables are presented as mean (standard deviation), whereas categorical variables are expressed as proportions (%). AD+, Alzheimer's disease; APOE  $\epsilon$ 4, apolipoprotein E  $\epsilon$ 4 allele; CN, cognitively normal.

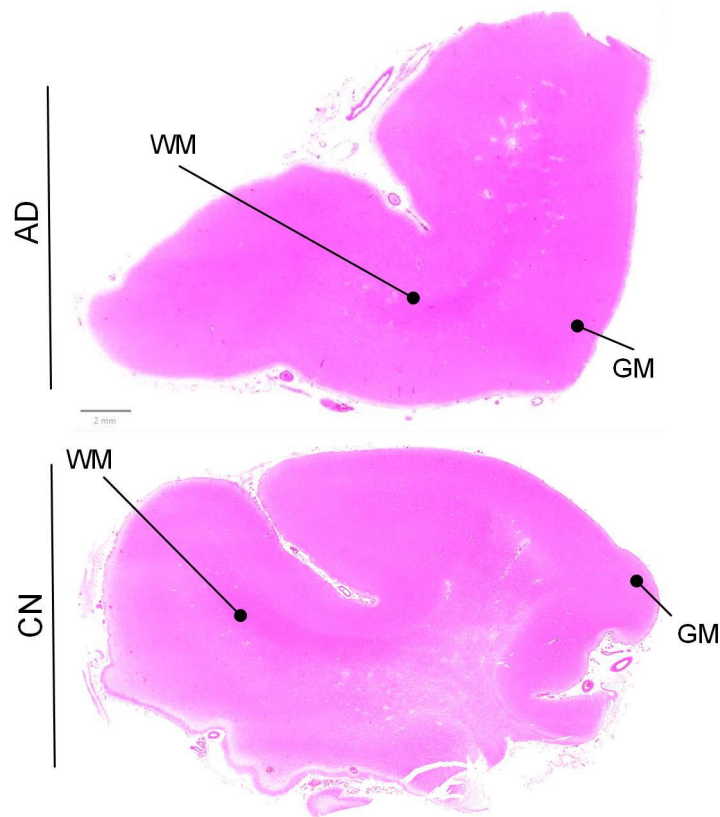

**Supplementary Fig. 1 |. Representative hematoxylin and eosin (H&E)-stained sections of gray matter (GM) and white matter (WM) in a cognitively normal (CN) participant and a patient with Alzheimer's disease (AD).**

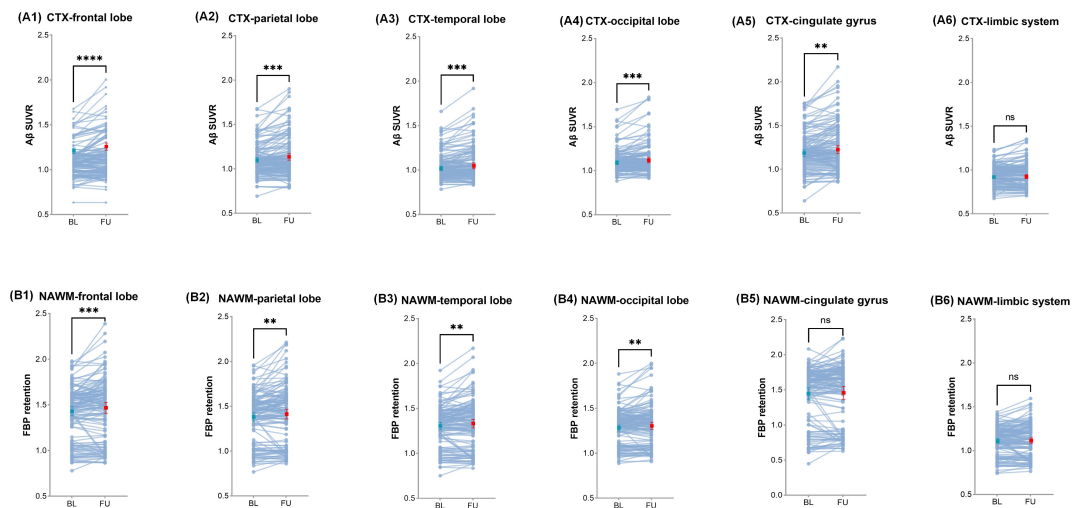

**Supplementary Fig. 2 |. Regional progression of A $\beta$  pathology in cognitively unimpaired participants over time. (A1~A6) Longitudinal changes in cortical A $\beta$  SUVR showing significant increases from baseline to follow-up in the frontal ( $p < 0.0001$ ), parietal ( $p < 0.001$ ), temporal ( $p < 0.001$ ), occipital ( $p < 0.001$ ) cortices, as well as the cingulate gyrus ( $p < 0.01$ ). No significant differences were observed in the limbic cortex. (B1~B6) White matter FBP retention also increased significantly over time in the frontal, parietal, temporal, and occipital regions (all  $p <$**

0.01), while cingulate and limbic white matter showed no significant changes. A $\beta$ ,  $\beta$ -amyloid; BL, baseline; CTX, cortical; CU, cognitively unimpaired; FBP,  $^{18}\text{F}$ -florbetapir; FU, follow-up; NAWM, normal-appearing white matter; SUVR, standardized uptake value ratio;  $*p < 0.05$ ;  $**p < 0.01$ ;  $***p < 0.001$ ;  $****p < 0.0001$ ; ns, non-significant.

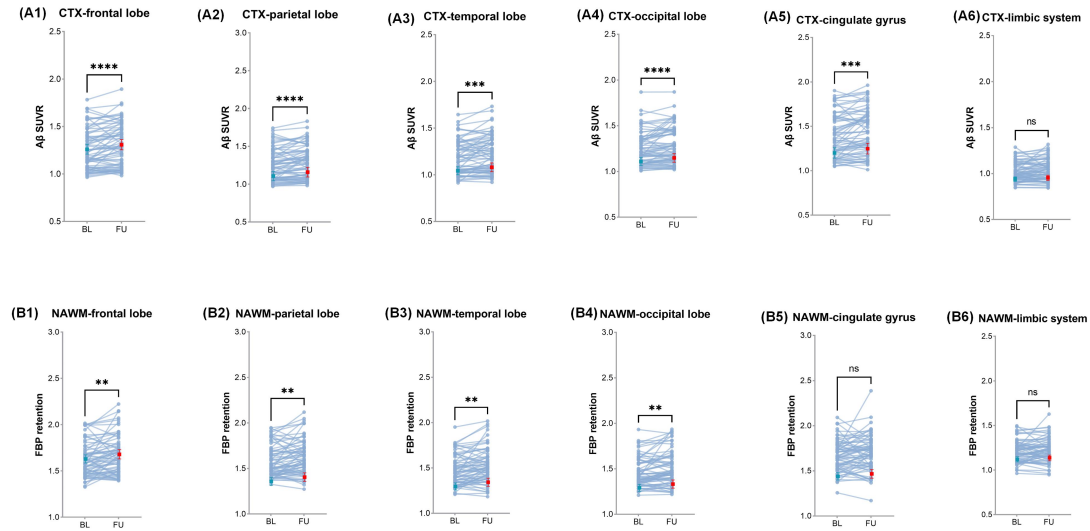

**Supplementary Fig. 3 |. Regional progression of A $\beta$  pathology in cognitively impaired participants over time. (A1~A6)** Cortical A $\beta$  burden showed significant longitudinal increases in all cortical regions except the limbic system (all  $p < 0.001$ ) during the follow-up period. **(B1~B6)** White matter FBP retention increased significantly over time in frontal, parietal, temporal, and occipital regions (all  $p < 0.01$ ), whereas no significant changes were observed in cingulate and limbic white matter. A $\beta$ ,  $\beta$ -amyloid; BL, baseline; CI, cognitively impaired; CTX, cortical; FBP,  $^{18}\text{F}$ -florbetapir; FU, follow-up; NAWM, normal-appearing white matter; SUVR, standardized uptake value ratio;  $*p < 0.05$ ;  $**p < 0.01$ ;  $***p < 0.001$ ;  $****p < 0.0001$ ; ns, non-significant.
